# Supplementary material for: Toward Cultural Assessment of Grief and Grief-Related Psychopathology
Source: Atypon-hosted journal article supplement (doi:10.1176/appi.ps.201700422), 2018-07-25
Supplement: appi.ps.201700422.ds001.pdf [file appi.ps.201700422.ds001.pdf]

Online supplement

*Draft Supplementary Module to the DSM-5 Cultural Formulation Interview (CFI)*

### **Bereavement and Grief**

Related Core CFI Questions: 1, 4, 6, 7, 8, 9, 10, 11, 12, 14, 15

**GUIDE TO INTERVIEWER:** *The following questions aim to clarify key aspects of loss of loved ones, bereavement and grief from the point of view of the individual and other members of the individual's social network (i.e., family, friends, or others). Comprehensive cultural assessment encompasses completion of the core CFI. In order to identify grief-related problems, probe for (1) the loss of loved ones as a potential cause of the problem (e.g., core CFI questions 1, 4); (2) loved ones being missing persons as potential additional stressor, especially following migration (e.g., core CFI question 7); (3) rituals that could not be performed as a potential aspect of cultural identity causing concerns, difficulties, and feelings of guilt (e.g., core CFI questions 10, 11, 12).*

**INTRODUCTION FOR THE INDIVIDUAL BEING INTERVIEWED:** Sometimes peoples' background affects how they deal with the loss of loved ones. In order to better help you, I would like to learn to understand the way you, your family, friends, and others in your community deal with the loss of loved ones.

#### ***Cultural traditions related to death, bereavement, and mourning***

1. If someone from your family, friends, or others in your community passes away, how would people usually arrange the funeral/farewell? (*PROBE AS NEEDED: Is there a prescribed period after death that a person should be buried or cremated?*)
2. Are there other rituals after people have passed away, for example, do people hold a wake? Do people find it important to perform these rituals? And if yes, why?

3. Who should be present at these rituals and/or the funeral/farewell and why is that important?
4. How do your family, friends, and others in your community mourn or express their grief after the funeral/farewell? Could you tell me about a prescribed period of mourning or expressing grief?
5. When and how do people talk about the deceased? (*PROBE AS NEEDED: Is it considered appropriate to talk about the deceased?*) Are there certain moments when the deceased is remembered, such as yearly commemorations? Can you tell me more about this?
6. When bereaved people have dreams or other types of encounters with the deceased (e.g., seeing the deceased or talking to him or her), what could that mean? And what would this mean according to your family, friends, and others in your community?
7. What do your family, friends, and others in your community think happens after death? (*PROBE AS NEEDED: Does it matter in what way the loved one died, e.g. in case of suicide? Could you elaborate on that?*) Are there ways in which the living can influence the spiritual status of the deceased in the afterlife? Are there ways in which the deceased can influence the living? Can you tell me more about this?

***Help-seeking and coping related to the loss of loved ones***

8. Do you engage in practices or take part in activities related to particular spiritual, religious or moral traditions to help you cope with the loss of a loved one (e.g., prayer, meditation, worships, gatherings, or talking to a religious or spiritual leader)?
9. Have any of these practices or activities been helpful in coping with the loss of your loved one (e.g., in dealing with guilt feelings or anger)? In what way?

10. Are there other kinds of help to deal with the loss of your loved one that your family, friends, or other people have suggested? What kinds of help do you think would be most useful to you at this time to deal with the loss of your loved one?
